# Supplementary material for: Hydroxycinnamoyl-coenzyme A: tetrahydroxyhexanedioate hydroxycinnamoyl transferase (HHHT) from Phaseolus vulgaris L.: phylogeny, expression pattern, kinetic parameters, and active site analysis
Source: PeerJ. 2025 Feb 20;13:e19037. doi: 10.7717/peerj.19037 (PMC11847488; doi:10.7717/peerj.19037)
Supplement: Supplemental Information 7 [file peerj-13-19037-s007.xlsx]

## Sheet: pH with pCA and Sacch
pH	Rate (delta mA 412 nm/min)
6.5	29.3	34.5
7	50.5	49.2
7.5	64.9	67.2
8	71.5	69.6

## Sheet: pCA with Sacch
[pCA-CoA] uM	Rate (delta mA 412 nm/min)
1	4	4.7
2.5	8.4	9.4
5	15.7	16.2
7.5	19.7	20.6
10	22.2	25.3
15	25.7	30.4
25	29.9	33.2
50	32	35.9
75	34	38
100	35	36.9

## Sheet: CA with Sacch
[CA-CoA] uM	Rate (delta mA 412 nm/min)
1	4.5	4.5
1.75	8.4	7.8
2.5	10.1	10.6
3.75	14.4	16.1
5	16	18
7.5	21.2	22.3
10	22.8	24.8
15	25.3	29.1
25	29.1	33.5
50	31.7	33
75	33.9	36.9
100	33.7	35.9

## Sheet: FA with Sacch
[FA-CoA] uM	Rate (delta mA 412 nm/min)
1	5.4	4.8
1.75	8.5	7.9
2.5	10.7	11.6
3.75	15	15.4
5	18.2	19.2
7.5	23.2	25.1
10	26.9	28.6
15	31.7	34.4
25	35.9	39.6
50	38.9	43.4
75	41.8	41.2
100	41.4	40

## Sheet: Sacch with pCA
[Sacch] mM	Rate (delta mA 412 nm/min)
0.25	2.9	4.5
0.5	6.6	5.6
1	9	9.5
2	14.4	14.4
3	18.1	18
5	23.3	23.1
7.5	27.1	27.5
10	32.3	30.8
12.5	33.6	32
15	36.3	36.4
20	39.4	43.3

## Sheet: Sacch with CA
[Sacch] mM	Rate (delta mA 412 nm/min)
0.25	7.3	7.4
0.5	9.5	11.1
1	12.7	13.8
2	16.4	18.4
3	18.9	22.5
5	24.2	26.4
7.5	27.7	32.4
10	31.7	35.6
12.5	34.4	38.3
15	39.3	40.2
20	39	44.7

## Sheet: Sacch with FA
[Sacch] mM	Rate (delta mA 412 nm/min)
0.25	6.7	9.7
0.5	11.5	10.7
1	16.7	17.6
2	26.7	27.3
3	33.6	33
5	41.3	40.6
7.5	47.8	45.3
10	50.3	48.9
12.5	52.4	51.1
15	53.9	52.5
20	52.8	55.8

## Sheet: pCA with Mucic
[pCA-CoA] uM	Rate (delta mA 412 nm/min)
1	3.4	3.9
2.5	8.9	8.9
5	13.5	16.7
7.5	17.4	21
10	21.6	24.8
15	24.9	29
25	32.6	31.6
50	34.2	33.3
75	36.1	35.5
100	36.1	36.6

## Sheet: CA with Mucic
[CA-CoA] uM	Rate (delta mA 412 nm/min)
1	2.7	2.7
2.5	5.6	5.2
5	9.2	9.2
7.5	13.2	12.6
10	17.3	17.2
15	24	24.5
25	32.9	31.6
50	39.7	29.5
75	41	42.6
100	43.7	42.7

## Sheet: FA with Mucic
[FA-CoA] uM	Rate (delta mA 412 nm/min)
1	3	4.2
2.5	8.5	9.6
5	15	16.1
7.5	20.6	21.6
10	24.1	26.2
15	27.4	28.6
25	35.6	35
50	38.7	39.2
75	38.7	42.8
100	40.9	44.6

[truncated: 3 more sheets: Mucic with pCA, Mucic with CA, Mucic with FA]
